# Supplementary material
Source: MDPI journal article supplement (https://www.mdpi.com/2077-0472/10/11/535)
Supplement: s1 [file s1]

**Table S1.** Mineral content present for each genotype evaluated.

| <b>Genotype of Corn</b>   | <b>Ca</b>               | <b>Mg</b>              | <b>Se</b>             | <b>Zn</b>                   | <b>Fe</b>                      | <b>I</b>               |
|---------------------------|-------------------------|------------------------|-----------------------|-----------------------------|--------------------------------|------------------------|
|                           | ( mg per 100 g )        |                        |                       |                             |                                |                        |
| Creole white              | 19.1 <sup>c</sup>       | 68 <sup>f</sup>        | N/D <sup>b</sup>      | 1.98 <sup>c</sup>           | N/D <sup>f</sup>               | N/D <sup>b</sup>       |
| Creole white-creamy       | N/D <sup>d</sup>        | 73 <sup>d</sup>        | N/D <sup>b</sup>      | 2.23 <sup>b</sup>           | 2.87 <sup>b</sup>              | N/D <sup>b</sup>       |
| Creole yellow             | N/D <sup>d</sup>        | 80 <sup>b</sup>        | N/D <sup>b</sup>      | 1.84 <sup>d</sup>           | 1.93 <sup>c</sup>              | N/D <sup>b</sup>       |
| Creole blue               | N/D <sup>d</sup>        | 69                     | N/D <sup>b</sup>      | 1.71 <sup>d</sup>           | 2.21 <sup>b</sup> <sup>c</sup> | N/D <sup>b</sup>       |
| <b>* RDA (mg per day)</b> | <b>1000<sup>a</sup></b> | <b>260<sup>a</sup></b> | <b>34<sup>a</sup></b> | <b>4.2 – 14<sup>a</sup></b> | <b>9.0 – 27<sup>a</sup></b>    | <b>130<sup>a</sup></b> |
| Asgrow Hawk               | 25.1 <sup>b</sup>       | 66 <sup>g</sup>        | ND <sup>b</sup>       | 2.23 <sup>b</sup>           | 1.4 <sup>d</sup>               | N/D <sup>b</sup>       |
| Asgrow Sparrow-hawk       | N/D <sup>d</sup>        | 72.6 <sup>c</sup>      | N/D <sup>b</sup>      | 1.39 <sup>e</sup>           | N/D <sup>f</sup>               | N/D <sup>b</sup>       |
| Aspros AS-722             | N/D <sup>d</sup>        | 78 <sup>c</sup>        | N/D <sup>b</sup>      | 2.33 <sup>b</sup>           | 2.2 <sup>bc</sup>              | N/D <sup>b</sup>       |
| Hartz seed Z-60           | N/D <sup>d</sup>        | 56.6 <sup>h</sup>      | N/D <sup>b</sup>      | 1.85 <sup>cd</sup>          | N/D <sup>f</sup>               | N/D <sup>b</sup>       |

Means followed by the same letter are not significantly different for  $p \leq 0.05$  according to Tukey test; N/A = Value not presented. \*RDA recommended daily amount in mg per day [34].
